# Supplementary material for: No Association of Lower Hippocampal Volume With Alzheimer’s Disease Pathology in Late-Life Depression
Source: Atypon-hosted journal article supplement (doi:10.1176/appi.ajp.2016.16030319), 2016-08-19
Supplement: appi.ajp.2016.16030319.ds001.pdf [file appi.ajp.2016.16030319.ds001.pdf]

## Assessment of mood and cognition

As part of the neuropsychological examination, in addition to the Rey's Auditory Verbal Learning test<sup>1</sup> (main text), the following tests were performed in both patients and healthy controls: Animal Verbal Fluency<sup>2</sup> (AVF), Trail Making Test A and B<sup>3</sup> (TMT), digit span forward and backward, Raven's Continuous Progressive Matrices<sup>4</sup> (CPM) and the Purdue Pegboard Test<sup>5</sup> (PPT).

Participants were also scored on the Apathy Evaluation Scale<sup>6,7</sup>, to score the severity of apathy. Positive and negative affect were scored using the Positive and Negative Affect Schedule (PANAS)<sup>8</sup>.

Results are displayed in Table S1 below.

| Test/Scale              | Depression patients |       | Healthy controls |       | Group level statistical difference, p |
|-------------------------|---------------------|-------|------------------|-------|---------------------------------------|
|                         | mean                | sd    | mean             | sd    |                                       |
| AVF                     | 13                  | 4.55  | 21.8             | 5.26  | < 0.001                               |
| TMT (s)                 |                     |       |                  |       |                                       |
| A                       | 97.8                | 52.85 | 43.2             | 26.96 | < 0.001                               |
| B                       | 230.5               | 130.7 | 108.7            | 49.2  | < 0.001                               |
| Digit span              |                     |       |                  |       |                                       |
| Forward                 | 5.4                 | 1.53  | 6.1              | 1.03  | <0.01                                 |
| Backward                | 3.6                 | 1.48  | 4.2              | 0.8   | <0.01                                 |
| CPM (/12)               |                     |       |                  |       |                                       |
| A                       | 8.6                 | 2.38  | 10.4             | 1.37  | <0.001                                |
| B                       | 5.8                 | 2.78  | 8.7              | 2.47  | <0.001                                |
| PPT                     |                     |       |                  |       |                                       |
| Right Hand              | 8.6                 | 2.6   | 12               | 1.9   | <0.001                                |
| Left Hand               | 8.4                 | 2.92  | 11.7             | 2.0   | <0.001                                |
| Both hands              | 6.3                 | 2.74  | 9.5              | 1.58  | <0.001                                |
| Assembly                | 11.9                | 7.61  | 22.2             | 6.14  | <0.001                                |
| Apathy Evaluation Scale | 41.7                | 9.84  | 21.1             | 3.07  | <0.001                                |
| PANAS                   |                     |       |                  |       |                                       |
| Positive Affect         | 18.4                | 6.59  | 34               | 6.61  | <0.001                                |
| Negative Affect         | 29                  | 9.3   | 13.8             | 9.13  | <0.001                                |

## Statistical Analysis of Group Differences Using an SUVR Threshold of 1.5

In our primary analysis we chose an SUVR threshold of >1.38 to determine amyloid positive status. However, other studies have used >1.5. To satisfy interested readers and alleviate any concerns that our findings were the result of a threshold effect, we repeated the analyses using an SUVR cut-off of 1.5. Our findings remained the same using both thresholds:

1. There was no difference in the proportion of participants with a positive versus a negative amyloid scan between groups at a threshold of 1.5  $\chi^2(1)=0.331$ , Fisher's exact  $p=0.545$ .
2. There was a significant difference in mean normalized total hippocampal volume between 43 amyloid negative patients and 44 controls:  $t(85)=2.309$ ,  $p=0.023$ ,  $d_{Cohen}=0.495$ ), but no group difference in the distribution of SUVR values or median amyloid load (Mann-Whitney U and Median test,  $p=0.312$  and  $p=0.593$  respectively) (Figure 3).

## REFERENCES

1. Ivnik RJ, Malec JF, Tangalos EG, Petersen RC, Kokmen E, Kurland LT. The auditory verbal learning test (AVLT): Norms for ages 55 years and older. *Psychol Asses* 1990;2:304-312.
2. Goodglass H, Kaplan E. *Assessment of aphasia and related disorders*. Philadelphia: Lea & Febiger; 1972.
3. Reitan RM. Validity of the Trail Making test as an indicator of organic brain damage. *Percept Mot Skills*. 1958; 8 :271-276.
4. Raven JC. *Guide to using the coloured progressive matrices*. London: H.K. Lewis, 1956.
5. Lafayette Instrument Company (LIC). *Instructions and normative data for Model 32020, Purdue Pegboard*. Lafayette, IN: LIC, 1985.
6. Marin RS, Biedrzycki RC, Firinciogullari S: Reliability and validity of the Apathy Evaluation Scale. *Psychiatry Res*; 1991, 38:143-162,
7. Wurff, F.B. van der, Beekman, A.T.F., Comijs, H.C., e.a. Apathie: een zelfstandige klinische entiteit? *Tijdschrift voor Gerontologie en Geriatrie*; 2003, 34, 146-150.
8. Watson, D., Clark, L. A., & Tellegen, A. Development and validation of brief measures of positive and negative affect: The PANAS scales. *Journal of Psychology*; 1988, 54(6), 1063-1070.
